# Supplementary material for: Genetic dynamics underlying phenotypic development of biomass yield in triticale
Source: PubMed Central journal article supplement (PMC4070554; doi:10.1186/1471-2164-15-458), 2014-06-10
Supplement: 12864_2013_6128_MOESM1_ESM.pdf [file 12864_2013_6128_MOESM1_ESM.pdf]

# **Genetic dynamics underlying phenotypic development of biomass yield in triticale**

Wenxin Liu<sup>1</sup>, Manje Gowda<sup>2</sup>, Jochen C. Reif<sup>3</sup>, Volker Hahn<sup>2</sup>, Arno Ruckelshausen<sup>4</sup>, Elmar A. Weissmann<sup>5</sup>, Hans Peter Maurer<sup>2</sup>, Tobias Würschum<sup>2§</sup>

## **Additional files**

## Additional file 1 – Additional Tables and Figures.

**Table S1 - Summary statistics for biomass yield [t ha<sup>-1</sup>] at the three developmental stages.**

|                         | BM1    | BM2     | BM3 <sup>§</sup> |
|-------------------------|--------|---------|------------------|
| Min                     | 2.27   | 5.16    | 8.13             |
| Mean                    | 6.52   | 10.51   | 14.97            |
| Max                     | 8.10   | 13.77   | 18.71            |
| $\sigma_G^2$            | 2.91** | 16.83** | 23.28**          |
| $\sigma_{G \times E}^2$ | 0.95** | 2.32**  | 4.39**           |
| $\sigma_e^2$            | 2.69   | 6.00    | 17.34            |
| $h^2$                   | 0.81   | 0.91    | 0.85             |

Genotypic variance ( $\sigma_G^2$ ), genotype by location interaction variance ( $\sigma_{G \times E}^2$ ), error variance ( $\sigma_e^2$ ), and heritability ( $h^2$ ). \*\* significant at the 0.01 probability level. § reported in Alheit et al. 2013

**Table S2 - QTL detected for biomass yield at three developmental stages (BM1-BM3).**

|            | Chromosome | Position in cM<br>(support interval) | $p_G$ |
|------------|------------|--------------------------------------|-------|
| <i>BM1</i> |            |                                      |       |
|            | 3A         | 57.6 [55.9 - 57.7]                   | 4.0   |
|            | 5A         | 26.7 [21.7 - 32.3]                   | 8.2   |
|            | 6A         | 57.7 [57.5 - 57.9]                   | 3.4   |
|            | 7A         | 66.0 [65.0 - 66.8]                   | 2.8   |
|            | 7B         | 19.6 [19.6 - 19.6]                   | 2.5   |
|            | 4R         | 79.6 [75.9 - 81.7]                   | 2.8   |
|            | 5R         | 14.4 [13.8 - 16.3]                   | 28.0  |
|            | 6R         | 65.2 [65.0 - 65.3]                   | 3.1   |
|            | 7R         | 40.7 [40.7 - 40.7]                   | 3.2   |
|            | 7R         | 46.6 [46.2 - 48.4]                   | 3.3   |
| <i>BM2</i> |            |                                      |       |
|            | 3A         | 60.4 [59.9 - 60.5]                   | 2.1   |
|            | 4A         | 20.5 [20.4 - 20.7]                   | 2.9   |
|            | 5A         | 32.8 [29.3 - 33.6]                   | 7.3   |
|            | 6A         | 57.7 [57.5 - 57.9]                   | 5.9   |
|            | 2B         | 151.1 [151.1 - 151.8]                | 1.8   |
|            | 5B         | 20.4 [13.9 - 20.8]                   | 2.9   |
|            | 3R         | 70.4 [70.4 - 70.8]                   | 1.7   |
|            | 4R         | 74.9 [74.9 - 77.0]                   | 3.5   |
|            | 5R         | 15.7 [15.0 - 17.0]                   | 34.0  |
|            | 6R         | 65.2 [65.0 - 65.3]                   | 1.9   |
| <i>BM3</i> |            |                                      |       |
|            | 4A         | 17.1 [16.8 - 17.8]                   | 2.2   |
|            | 5A         | 8.6 [3.3 - 17.3]                     | 2.6   |
|            | 5A         | 32.8 [28.3 - 33.6]                   | 5.5   |
|            | 6A         | 57.7 [57.5 - 57.9]                   | 5.5   |
|            | 3B         | 0.0 [0.0 - 3.8]                      | 2.5   |
|            | 5B         | 24.3 [20.8 - 24.8]                   | 2.6   |
|            | 1R         | 10.6 [10.2 - 10.6]                   | 3.3   |
|            | 4R         | 75.4 [74.9 - 81.2]                   | 2.2   |
|            | 5R         | 14.4 [13.8 - 16.3]                   | 35.6  |

Chromosome, position with support interval and proportion of genotypic variance explained by the QTL (in percent).

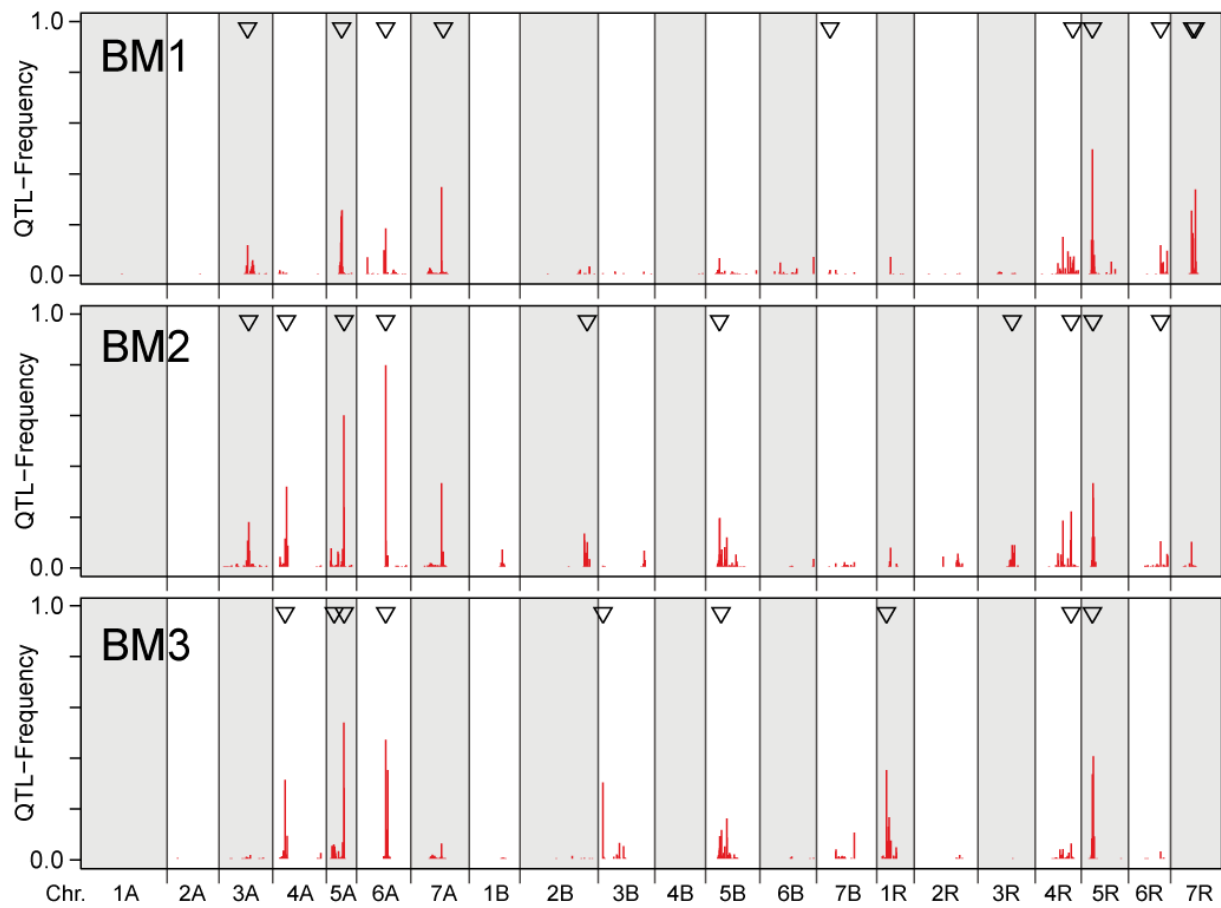

**Figure S1 - QTL frequency distributions.**

Frequency distributions for the QTL detected at three developmental stages (BM1-BM3) derived from fivefold cross-validation. The arrowheads indicate QTL positions of the full data set.
